# Supplementary material
Source: PubMed Central journal article supplement (PMC3417228)
Supplement: NIHMS392401-supplement-Supplemental_Figures.pdf [file NIHMS392401-supplement-Supplemental_Figures.pdf]

## Supplemental Figures

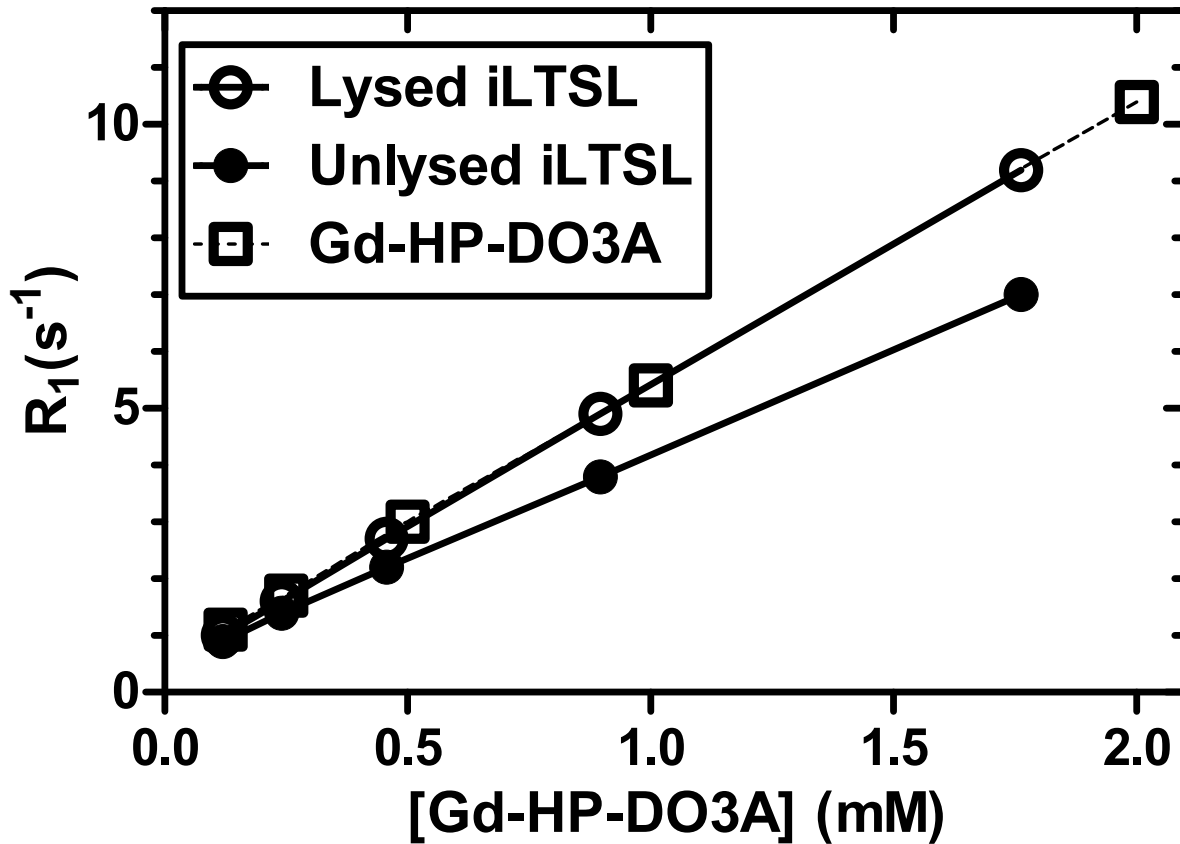

**Supplemental Figure 1. Calibration of  $R_1$  vs. concentration of Gd-HP-DO3A at 0.5T.** Triton X-100 was added to lyse iLTSL, releasing Gd-HP-DO3A and the drug. The resulting relaxivity (slope) values for lysed and intact iLTSL were  $4.994 \pm 0.010$  and  $3.70 \pm 0.02 \text{ mM}^{-1} \text{ s}^{-1}$ , respectively, and were significantly different ( $p < 0.0001$ , F test). Relaxivity of Gd-HP-DO3A ( $4.96 \pm 0.02 \text{ mM}^{-1} \text{ s}^{-1}$ ) was not significantly different from that of lysed iLTSL ( $p = 0.19$ , F test).  $R^2 > 0.9999$  for all fitted data.

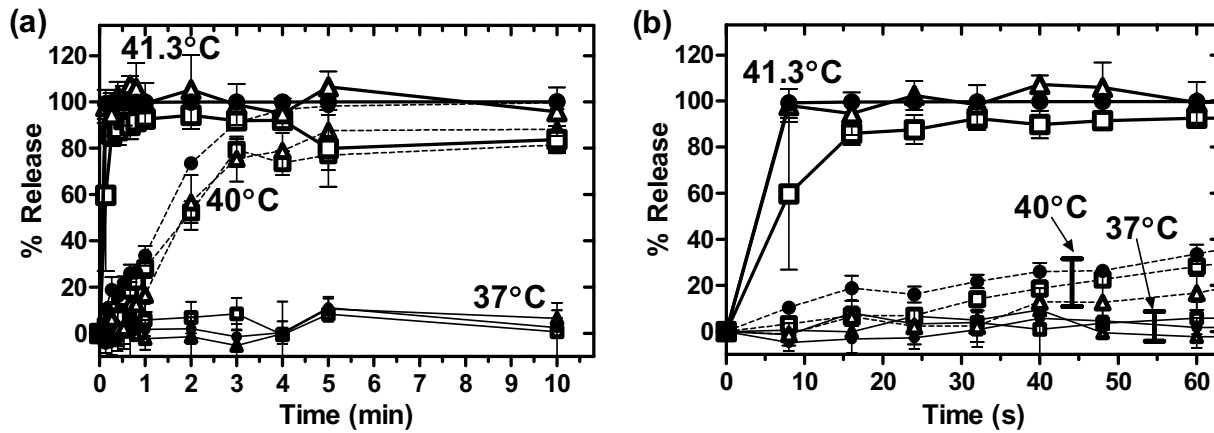

**Supplemental Figure 2. Percent release of Gd-HP-DO3A at 37, 40 and 41.3 °C.** a) Release over 10 minutes. b) Release over first minute of heating. The methods used to approximate % Gd-HP-DO3A release were  $T_1$  measurements before (method 1,  $\square$ ) and after (method 2,  $\triangle$ ) passing aliquots through two size exclusion chromatography columns, as well as concentration measurements with ICP-AES (method 3,  $\bullet$ ). Symbol size indicates temperature: 37 °C is smallest and 41.3 °C is largest. Maximum mean difference from ICP-AES measurements is  $7\pm 2\%$  for  $\square$  and  $9\pm 4\%$  for  $\triangle$ . Percent release magnitudes were not statistically different between ICP-AES and the other two methods of measurements ( $p > 0.05$ , Dunn's multiple comparison). Each point represents the mean of 3 experiments  $\pm$  SEM.

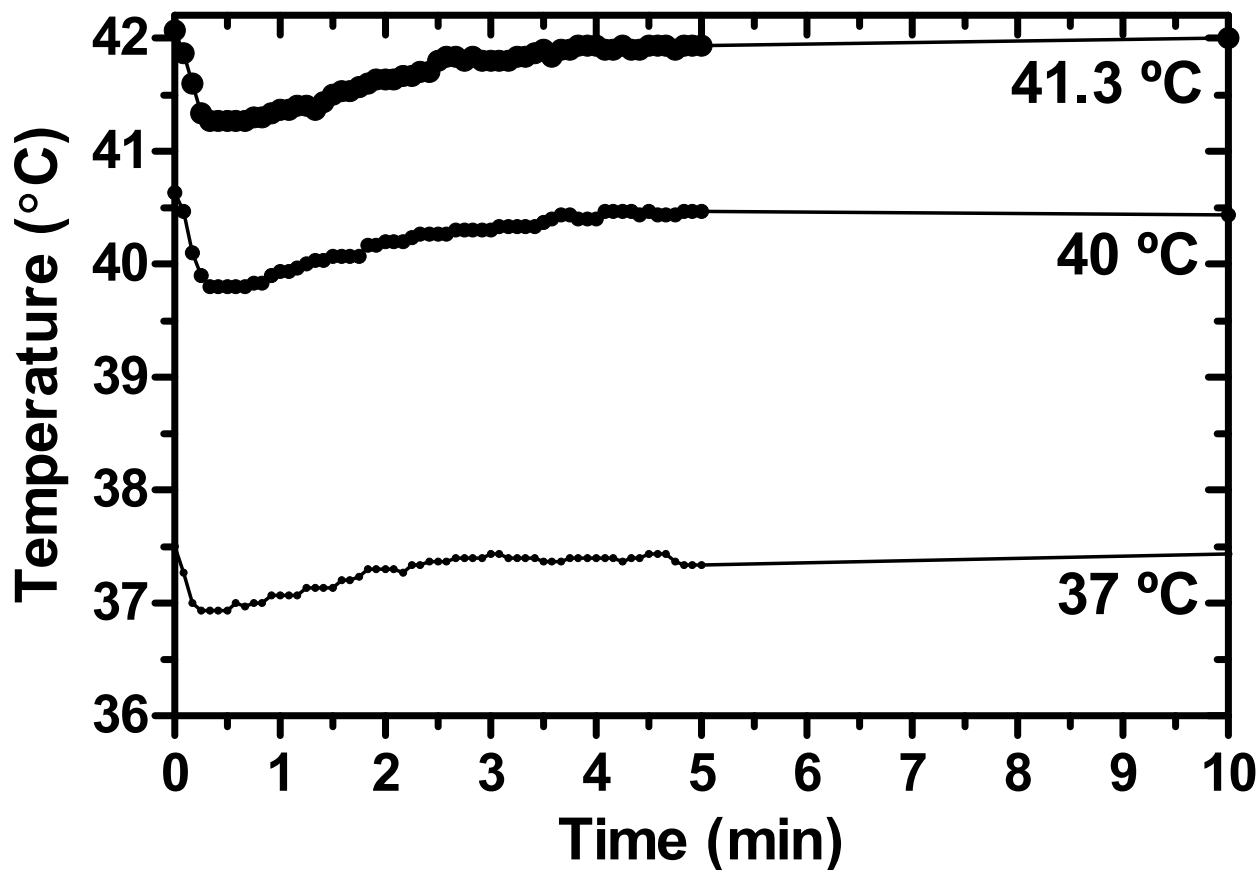

**Supplemental Figure 3. Temperature during release assay at 37, 40 and 41.3 °C in which both doxorubicin and Gd-HP-DO3A release were quantified (corresponding to Figure 2). The initial decrease in temperature is due to the addition of concentrated liposomal solution to the pre-heated HEPES buffer. The temperature of each release assay (shown on the right) was the target minimum temperature reached.**

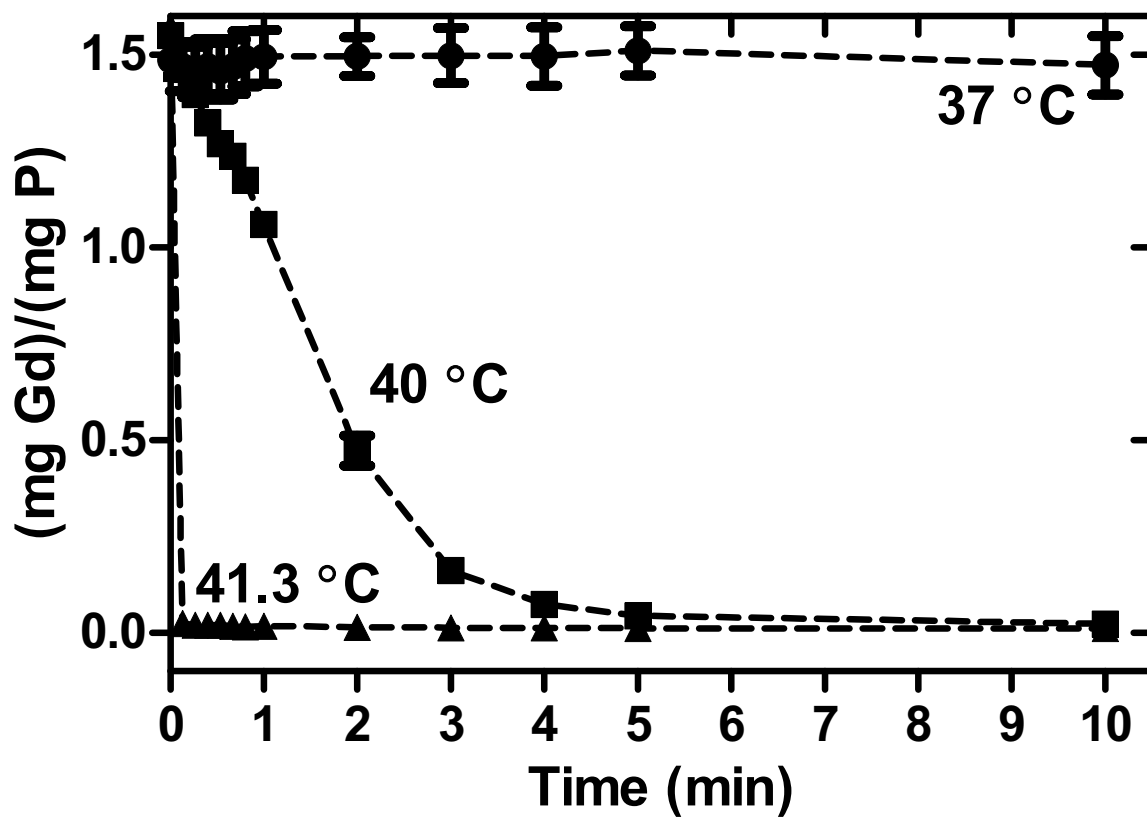

**Supplemental Figure 4.** Gd/P weight ratio as a function of time, as determined by ICP-AES at three temperatures, after released Gd-HP-DOA3 was removed with size exclusion chromatography (n=3).
